# Supplementary material for: High-affinity host–guest complex of cucurbit[7]uril with a bis(thiazolium) salt
Source: Royal Society of Chemistry journal article supplement (doi:10.1039/c5ra04468e), 2015-01-01
Supplement: c5ra04468e1.pdf [file c5ra04468e1.pdf]

## Electronic Supplementary Information

# High Affinity Host-Guest Complex of Cucurbit[7]uril with a Bis(thiazolium) Salt

Shengke Li,<sup>a</sup> Xiaoqing Miao,<sup>a</sup> Ian W. Wyman,<sup>b</sup> Ye Li,<sup>a</sup> Ying Zheng,<sup>a</sup> Yitao Wang,<sup>a</sup> Donal H. Macartney<sup>b,\*</sup> and Ruibing Wang<sup>a,\*</sup>

<sup>a</sup> State Key Laboratory of Quality Research in Chinese Medicine, Institute of Chinese Medical Sciences, University of Macau, Taipa, Macau, China

<sup>b</sup> Department of Chemistry, Queen's University, Kingston, ON, K7L 3N6, Canada.

\* Correspondence should be addressed to: donal@chem.queensu.ca (D. H. Macartney) or rwang@umac.mo (R. Wang)

| Contents                                                                                                                   | Page |
|----------------------------------------------------------------------------------------------------------------------------|------|
| <b>Figure S1.</b> <sup>1</sup> H NMR spectrum (400 MHz, D <sub>2</sub> O) of [BTX]Br <sub>2</sub>                          | S2   |
| <b>Figure S2.</b> <sup>13</sup> C{ <sup>1</sup> H} NMR spectrum (100 MHz, D <sub>2</sub> O) of [BTX]Br <sub>2</sub>        | S3   |
| <b>Figure S3.</b> HSQC NMR spectrum of [BTX]Br <sub>2</sub>                                                                | S4   |
| <b>Figure S4.</b> HPLC chromatogram of [BTX]Br <sub>2</sub>                                                                | S5   |
| <b>Figure S5.</b> NOESY spectrum of BTX <sup>2+</sup> -CB[7] complex                                                       | S6   |
| <b>Figure S6.</b> DOSY spectrum of BTX <sup>2+</sup> -CB[7] complex                                                        | S7   |
| <b>Calculation of Host-Guest Binding Constant by Competitive <sup>1</sup>H NMR spectroscopy</b>                            | S8   |
| <b>Figure S7.</b> <sup>1</sup> H NMR spectrum for competitive NMR binding constant calculation.                            | S9   |
| <b>Figure S8.</b> Kinetic plot for the C(2)-H/D exchange reaction of BTX <sup>2+</sup> as a function of pD at 298K         | S10  |
| <b>Figure S9.</b> Kinetic plot for the C(2)-H/D exchange reaction of {BTX•CB[7]} <sup>2+</sup> as a function of pD at 298K | S10  |
| <b>Figure S10.</b> UV-Visible spectra of continuous titration of BTX <sup>2+</sup> -CB[7]                                  | S11  |
| <b>Figure S11.</b> Energy-minimized structure of BTX <sup>2+</sup>                                                         | S12  |
| <b>Table S1.</b> Atomic coordinates for BTX <sup>2+</sup> from energy-minimization calculations                            | S12  |
| <b>Figure S12.</b> Energy minimized structure for {BTX•CB[7]} <sup>2+</sup> with atom labeled with center numbers          | S13  |
| <b>Table S2.</b> Atomic coordinates for {BTX•CB[7]} <sup>2+</sup> from energy-minimization calculations                    | S13  |
| <b>Full citation for Gaussian method reference</b>                                                                         | S17  |

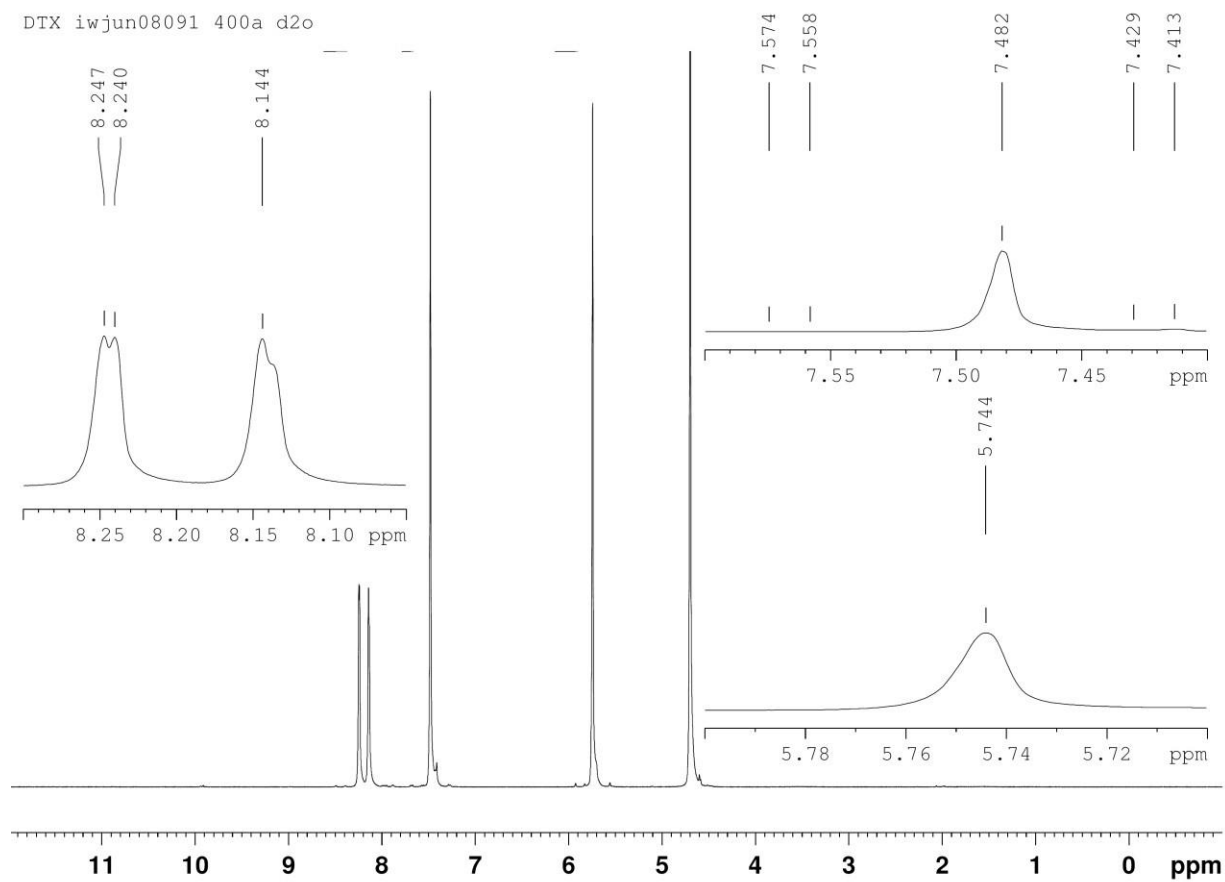

**Figure S1.**  $^1\text{H}$  NMR spectrum of  $[\text{BTX}]\text{Br}_2$  in  $\text{D}_2\text{O}$  (400 MHz). Note: the H2 proton (9.91 ppm) has exchanged with deuterium from  $\text{D}_2\text{O}$ .

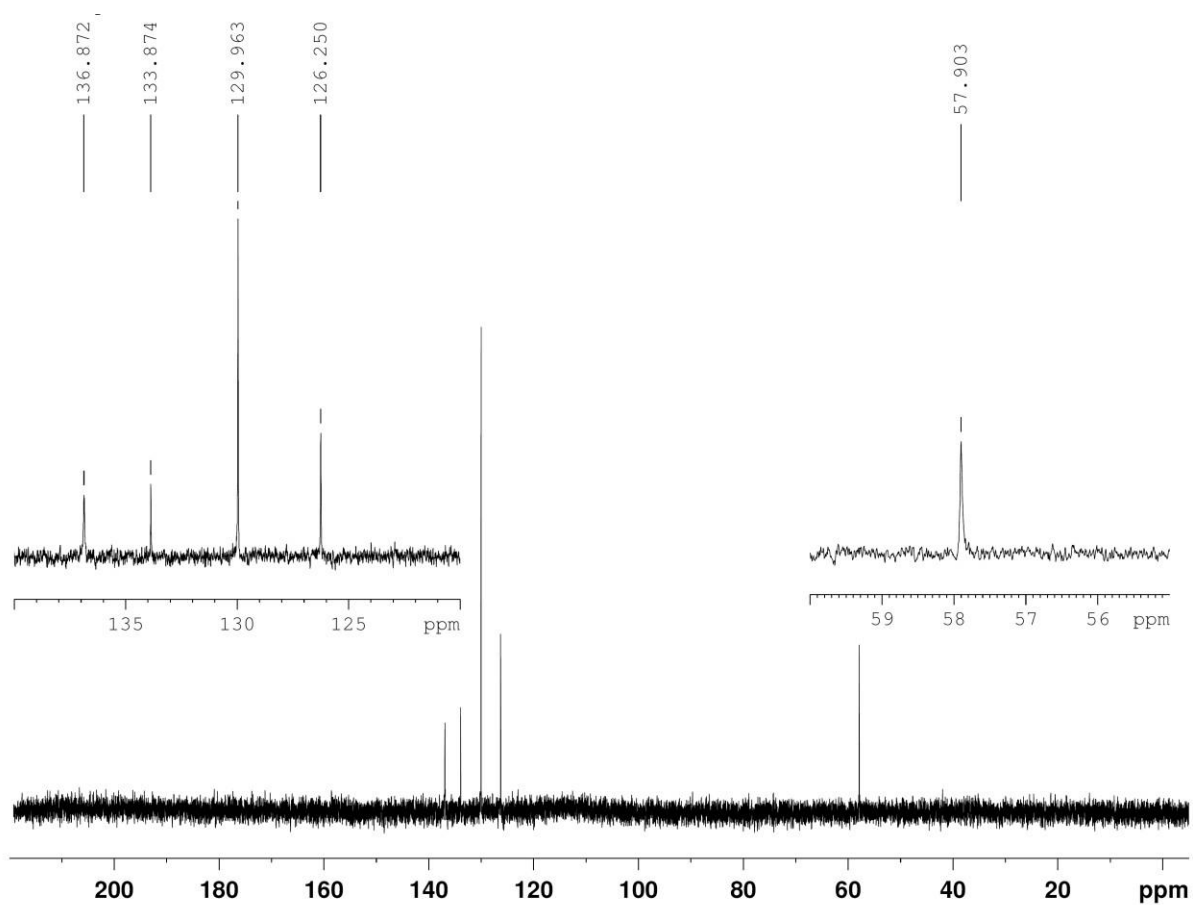

**Figure S2.**  $^{13}\text{C}$  NMR spectrum of  $[\text{BTX}]\text{Br}_2$  in  $\text{D}_2\text{O}$  (100 MHz). Note: the C1 and C4 carbons on the *p*-xylyl ring are not observed.

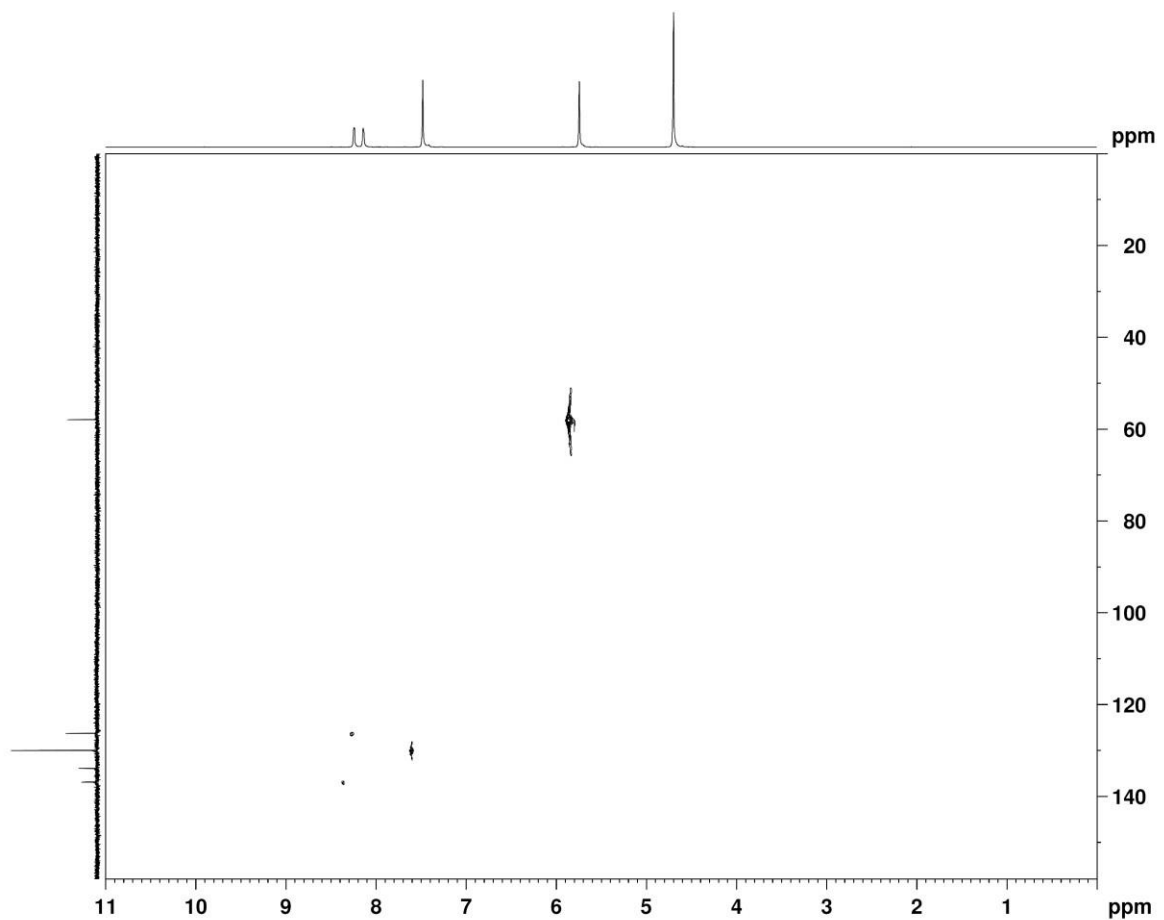

**Figure S3.** HSQC spectrum of [BTX]Br<sub>2</sub> in D<sub>2</sub>O. Note: there is no coupling between the C2 carbon and H2 proton resonances as the proton has been exchanged with deuterium from the D<sub>2</sub>O.

=====

|      |                              |     |                 |
|------|------------------------------|-----|-----------------|
| 操作者  | : 系统                         | 位置  | : 样品瓶 73        |
| 仪器   | : 1260LC                     |     |                 |
| 进样日期 | : 2015/5/26 9:30:41          | 进样量 | : 1.000 $\mu$ l |
| 采集方法 | : C:\CHEM32\1\METHODS\LC.M   |     |                 |
| 最后修改 | : 2015/5/26 9:29:47 : 系统     |     |                 |
| 分析方法 | : C:\CHEM32\1\METHODS\LC-1.M |     |                 |
| 最后修改 | : 2015/5/26 9:36:48 : 系统     |     |                 |

---

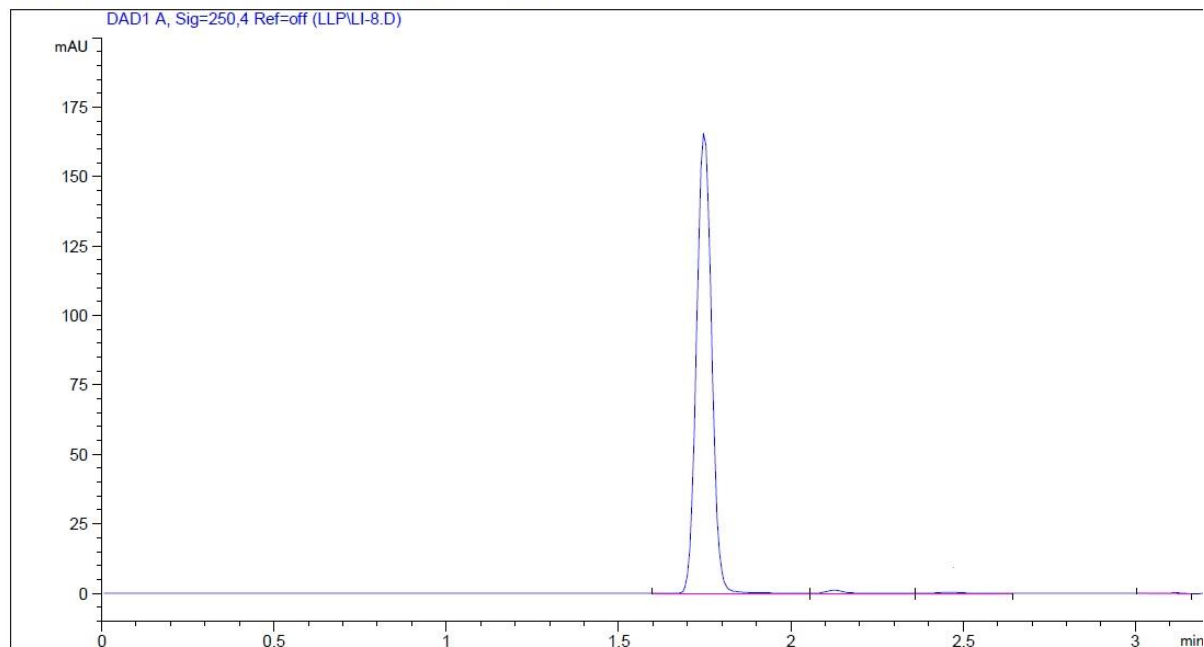

**Figure S4.** HPLC chromatogram of [BTX]Br<sub>2</sub>. Stationary phase: C18; Mobile phase: MeOH:H<sub>2</sub>O = 10: 90 (1.0g TTAB (Tetradecyltrimethylammonium bromide) and 2 mL glacial acetic acid was added into 500ml H<sub>2</sub>O). Temperature: 35 °C; Flow rate: 1 mL/min; Detection wave length: 250 nm. The PDA integration shows of a purity higher than 98% (consistent with <sup>1</sup>H and <sup>13</sup>C NMR spectra).

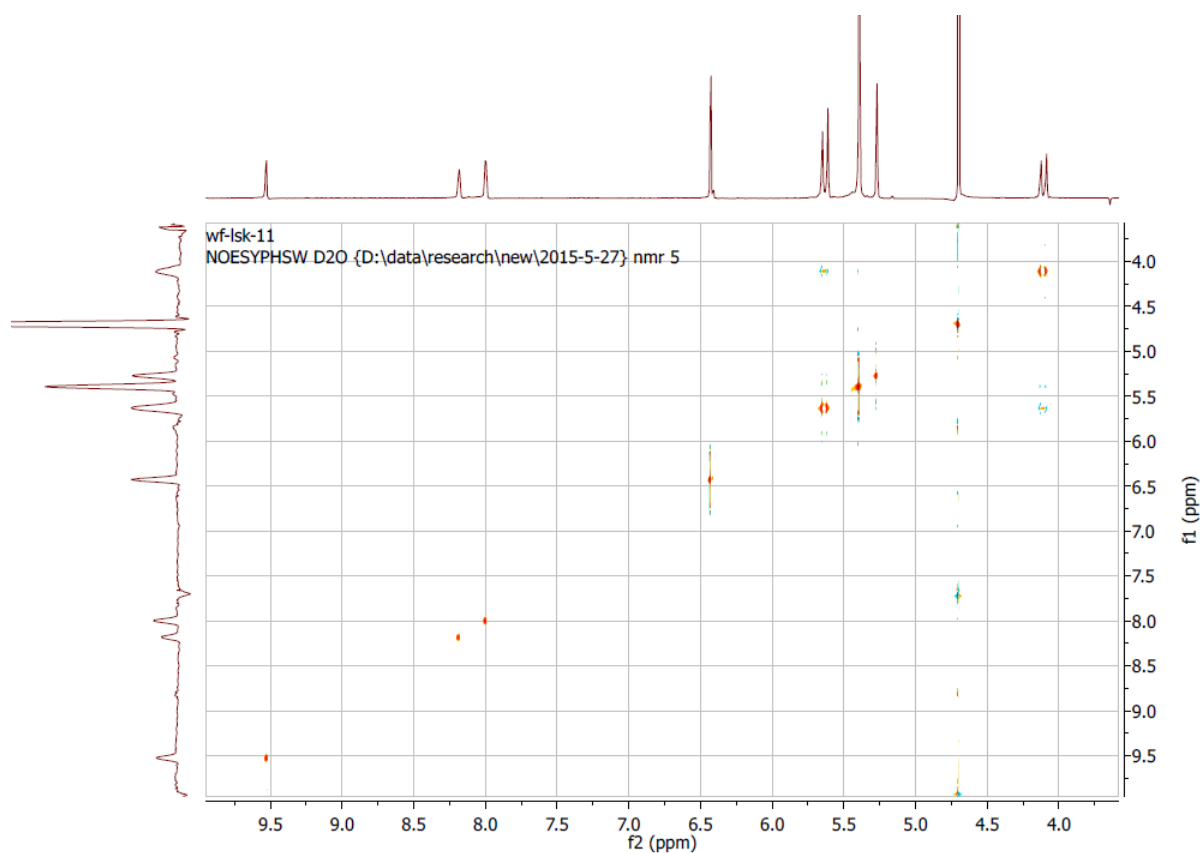

**Figure S5.** NOESY spectrum of  $\text{BTX}^{2+}$ -CB[7] complex showing no correlation between the host and guest protons due to the protons of the host CB[7] pointing “externally”. This data supports the formation of inclusion complex (instead of “exclusion”).

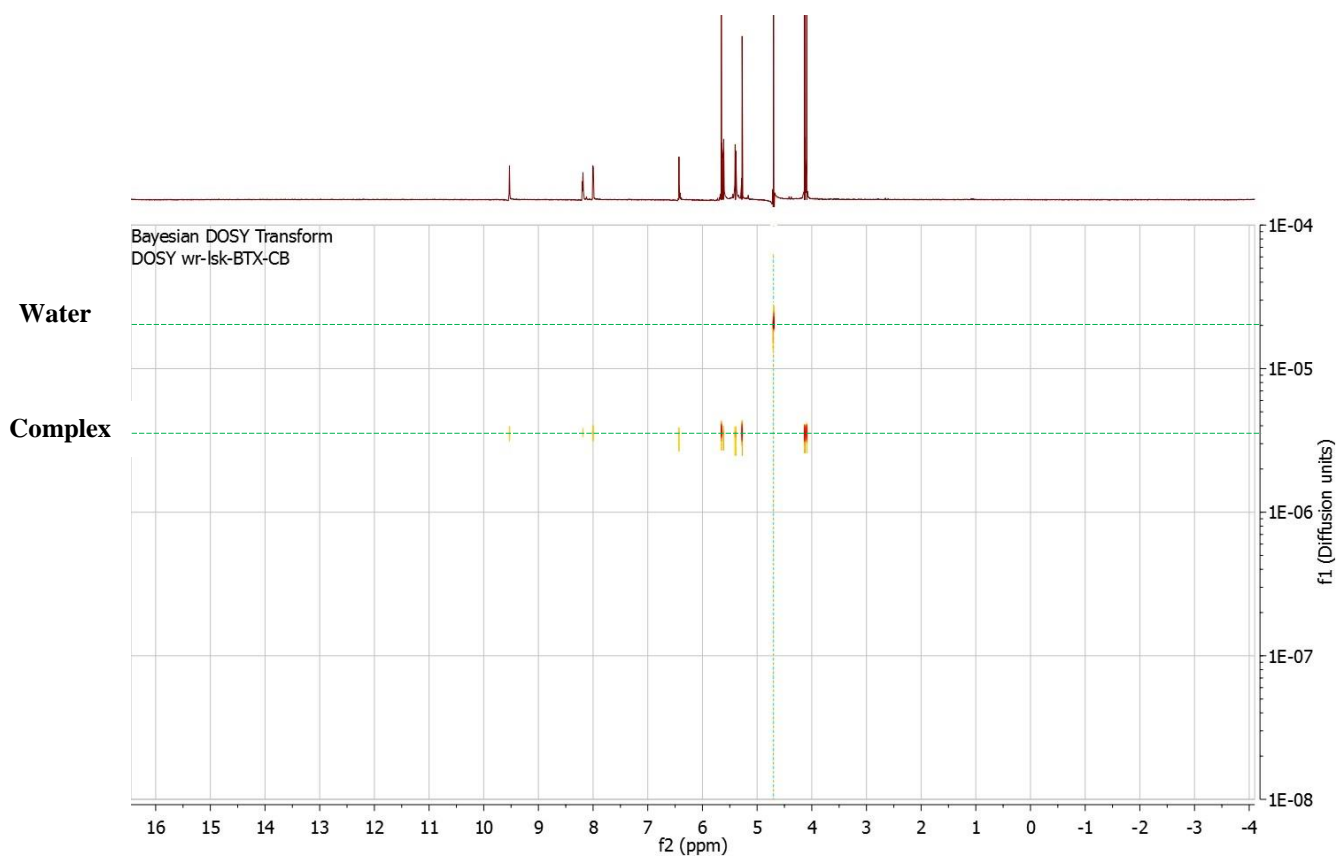

**Figure S6.** DOSY spectrum of  $\text{BTX}^{2+}$ -CB[7] complex showing identical diffusion coefficients for both the host and the guest protons attests the strong supramolecular complexation.

**Calculation of Host-Guest Binding Constant by Competitive  $^1\text{H}$  NMR spectroscopy**  
(see Figure S4 below)

$[\text{TMAF}]_{\text{total}} = 1.82 \text{ mM}$  (total integration of the free and bound trimethyl group protons is 9)

$$[\text{TMAF}]_{\text{bound}} = 1.82 \times 5.22/11 = 0.86 \text{ mM};$$

$$[\text{TMAF}]_{\text{free}} = 1.82 - 0.86 = 0.96 \text{ mM};$$

$[\text{BTX}^{2+}]_{\text{bound}} = 1.82 \times 3.70/4 = 1.68 \text{ mM}$  (Integration for bound-guest 4 aromatic proton is about 3.70);

$[\text{BTX}^{2+}]_{\text{free}} = 1.82 \times 81.93/4 = 37.28 \text{ mM}$  (Integration for free-guest 4 aromatic proton is 81.93);

Therefore,  $[\text{CB}[7]\text{-BTX}^{2+}]_{\text{complex}} = [\text{BTX}^{2+}]_{\text{bound}} = 1.68 \text{ mM};$

$$[\text{CB}[7]\text{-TMAF}]_{\text{complex}} = [\text{TMAF}]_{\text{bound}} = 0.86 \text{ mM};$$

As  $K_{\text{CB}[7]\text{-BTX}}/K_{\text{CB}[7]\text{-TMAF}} = [\text{CB}[7]\text{-BTX}^{2+}]_{\text{complex}} \times [\text{TMAF}]_{\text{free}} / ([\text{CB}[7]\text{-TMAF}]_{\text{complex}} \times [\text{BTX}^{2+}]_{\text{free}}) = 1.68 \times 0.96 / (0.86 \times 37.28) = 0.05$  and  $K_{\text{CB}[7]\text{-TMAF}} = (3.31 \pm 0.62) \times 10^{11} \text{ M}^{-1};$

Therefore,  $K_{\text{CB}[7]\text{-BTX}} = (1.66 \pm 0.31) \times 10^{10} \text{ M}^{-1}.$



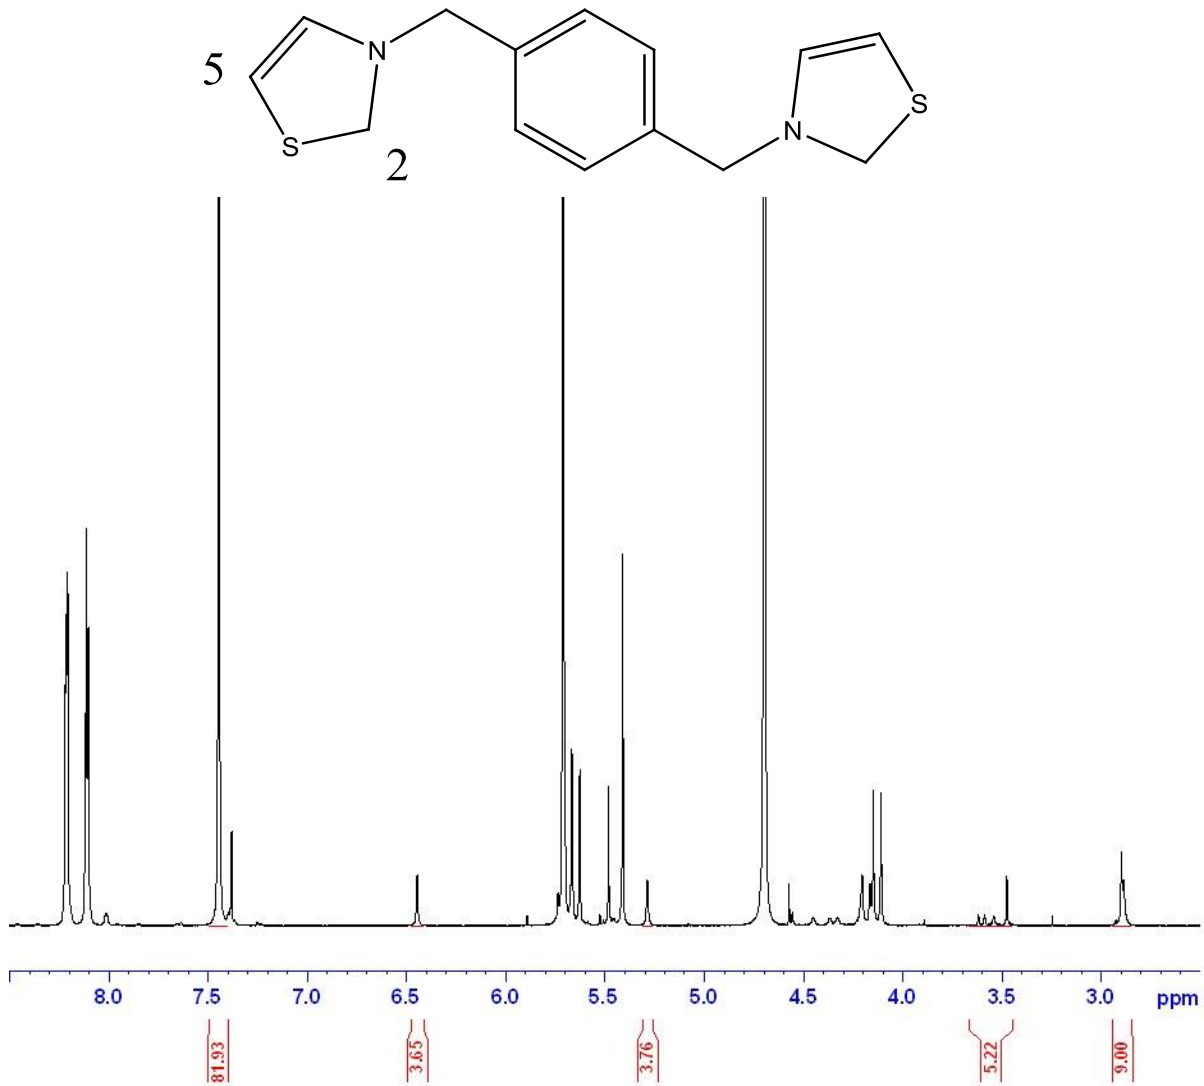

**Figure S7.** <sup>1</sup>H NMR spectrum for competitive NMR binding constant calculation.

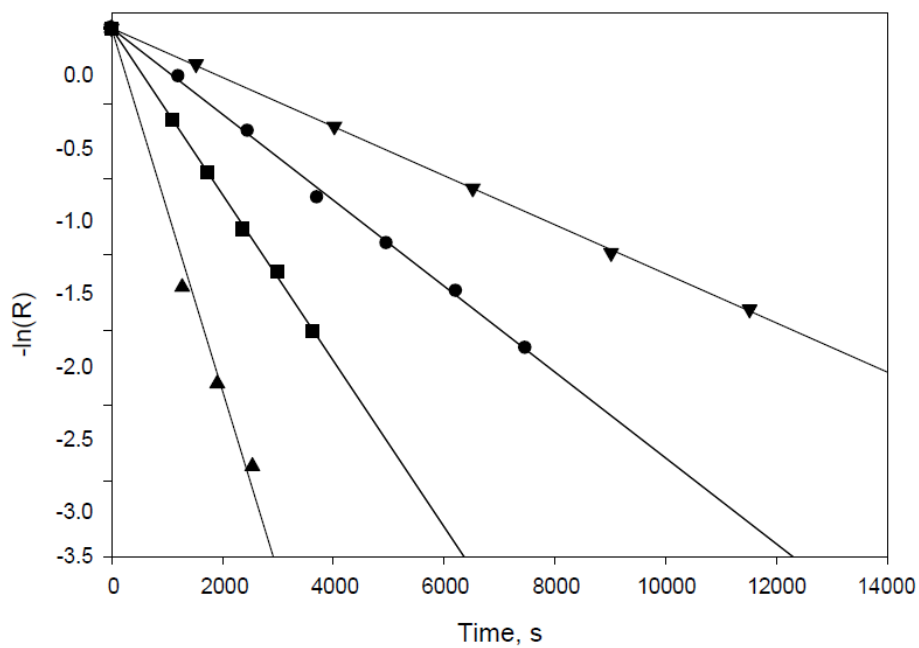

**Figure S8.** Kinetic plot for the C(2)-H/D exchange reaction of  $\text{BTX}^{2+}$  as a function of pD at 298K: pD = 4.26 (●), 4.54 (■), 4.81 (▲), and 3.96 (▼).

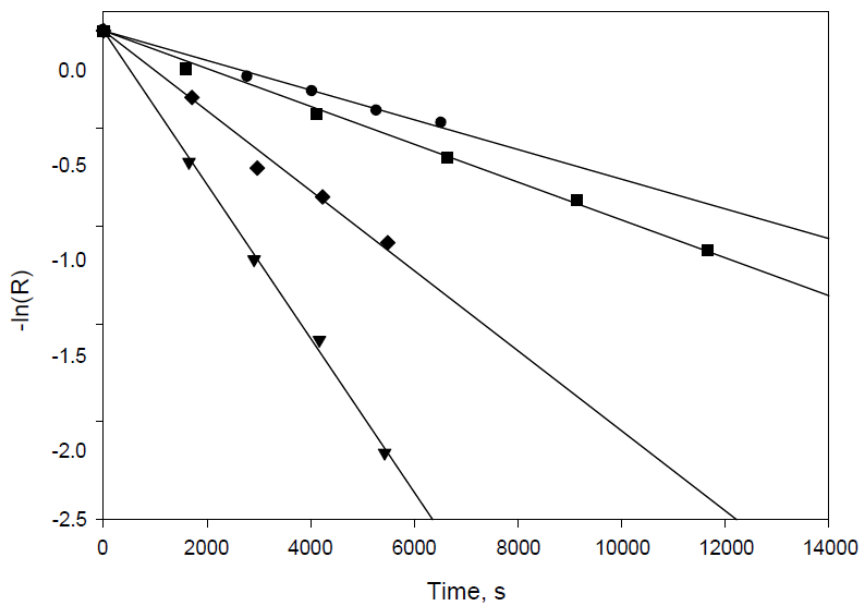

**Figure S9.** Kinetic plot for the C(2)-H/D exchange reaction of  $\{\text{BTX}\cdot\text{CB}[7]\}^{2+}$  as a function of pD at 298K: pD = 4.31 (●), 4.45 (■), 4.71 (▲), and 5.06 (▼).

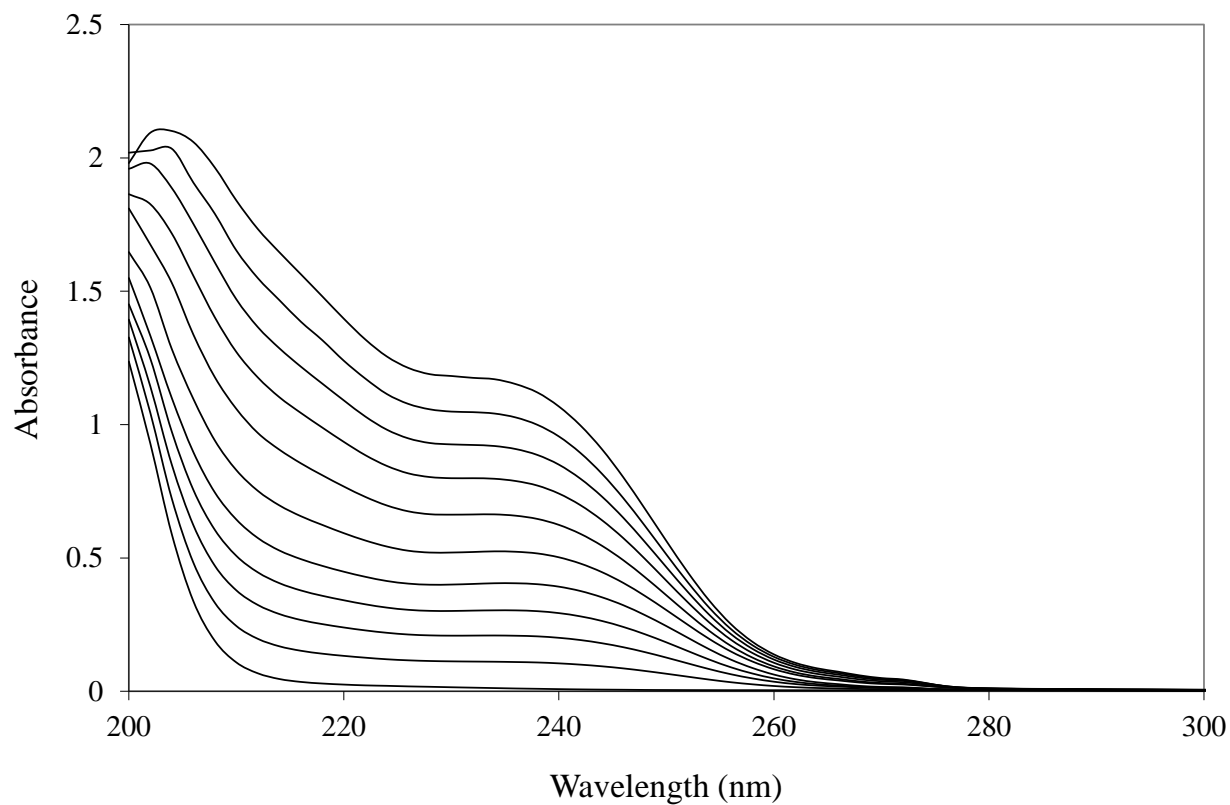

**Figure S10.** UV-visible spectra of continuous titration of BTX<sup>2+</sup>-[CB[7]]<sup>+</sup> (with [CB[7]] + [BTX<sup>2+</sup>] fixed at a constant concentration of 0.10 mM, and the ratio of [CB[7]]/[CB[7]+BTX<sup>2+</sup>] varies from 0, 0.1, 0.2 ... 1.0 from top to the bottom)

Energy-minimization calculations

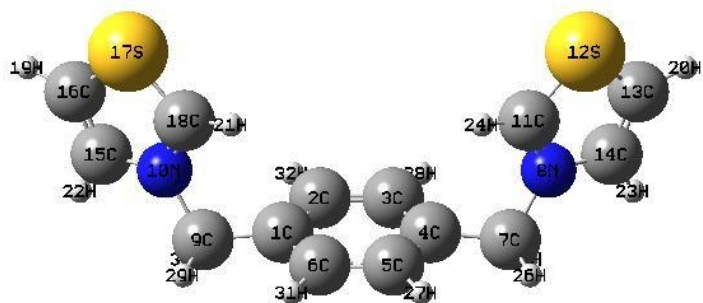

**Figure S11.** Energy-minimized structure of BTX<sup>2+</sup>

**Table S1.** Atomic coordinates for BTX<sup>2+</sup> (total energy = -5599.6459 au)

Standard orientation:

| Center Number | Atomic Type | Coordinates (Angstroms) |           |           |
|---------------|-------------|-------------------------|-----------|-----------|
|               |             | X                       | Y         | Z         |
| 1             | C           | -1.390724               | -1.462665 | 0.076006  |
| 2             | C           | -0.690026               | -1.037504 | -1.050962 |
| 3             | C           | 0.689916                | -1.037515 | -1.051045 |
| 4             | C           | 1.390744                | -1.462693 | 0.075836  |
| 5             | C           | 0.695881                | -1.853832 | 1.205562  |
| 6             | C           | -0.695732               | -1.853807 | 1.205651  |
| 7             | C           | 2.899275                | -1.617101 | 0.021887  |
| 8             | N           | 3.621739                | -0.292442 | -0.069611 |
| 9             | C           | -2.899265               | -1.617078 | 0.022242  |
| 10            | N           | -3.621740               | -0.292446 | -0.069453 |
| 11            | C           | 3.252826                | 0.797648  | 0.559557  |
| 12            | S           | 4.314832                | 2.077734  | 0.335689  |
| 13            | C           | 5.316705                | 1.096009  | -0.661877 |
| 14            | C           | 4.816337                | -0.140847 | -0.781177 |
| 15            | C           | -4.816350               | -0.140977 | -0.781030 |
| 16            | C           | -5.316729               | 1.095891  | -0.661923 |
| 17            | S           | -4.314843               | 2.077796  | 0.335456  |
| 18            | C           | -3.252832               | 0.797751  | 0.559533  |
| 19            | H           | -6.211281               | 1.469406  | -1.104460 |
| 20            | H           | 6.211247                | 1.469603  | -1.104367 |
| 21            | H           | -2.366439               | 0.844566  | 1.149327  |
| 22            | H           | -5.217149               | -0.962832 | -1.326359 |
| 23            | H           | 5.217137                | -0.962604 | -1.326652 |
| 24            | H           | 2.366438                | 0.844358  | 1.149365  |
| 25            | H           | 3.191387                | -2.174715 | -0.852302 |
| 26            | H           | 3.275631                | -2.118517 | 0.898462  |
| 27            | H           | 1.217848                | -2.197240 | 2.074844  |

|    |   |           |           |           |
|----|---|-----------|-----------|-----------|
| 28 | H | 1.216230  | -0.747796 | -1.937286 |
| 29 | H | -3.275528 | -2.118320 | 0.898957  |
| 30 | H | -3.191459 | -2.174873 | -0.851804 |
| 31 | H | -1.217600 | -2.197195 | 2.075000  |
| 32 | H | -1.216441 | -0.747780 | -1.937141 |

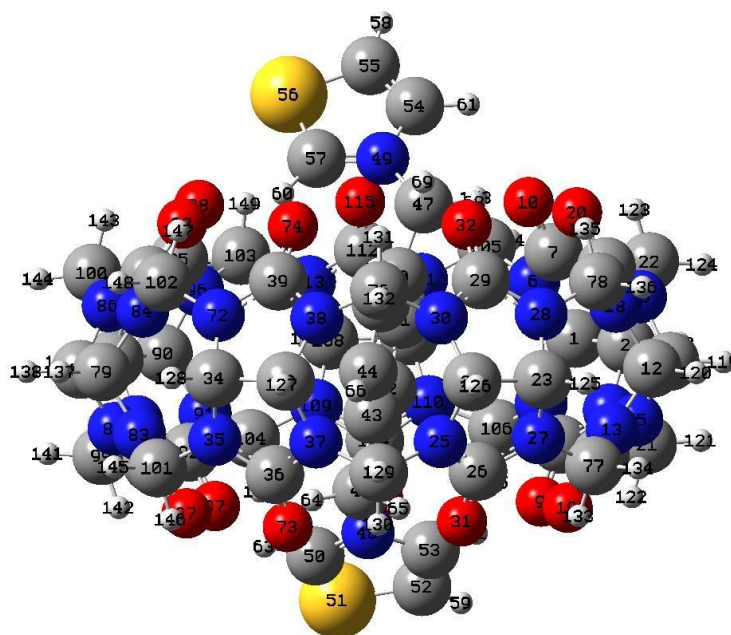

**Figure S12.** Energy minimized structure for {BTX•CB[7]} with atom labeled with center numbers (see table below)

**Table S2.** Atomic coordinates for {BTX•CB[7]} from energy-minimization calculations (total energy = -5599.6459 au)

Standard orientation:

| Center Number | Atomic Type | Coordinates (Angstroms) |          |           |
|---------------|-------------|-------------------------|----------|-----------|
|               |             | X                       | Y        | Z         |
| 1             | C           | -2.847019               | 5.017749 | -0.051681 |
| 2             | C           | -1.393959               | 5.639074 | -0.068118 |
| 3             | N           | -0.842138               | 5.110387 | -1.296194 |
| 4             | C           | -1.737791               | 4.361467 | -2.020043 |
| 5             | N           | -2.920025               | 4.328297 | -1.317764 |
| 6             | N           | -2.810989               | 4.170806 | 1.123996  |
| 7             | C           | -1.617107               | 4.229633 | 1.797118  |
| 8             | N           | -0.813823               | 5.130024 | 1.154413  |
| 9             | O           | -1.546326               | 3.892077 | -3.121626 |
| 10            | O           | -1.354570               | 3.642848 | 2.832195  |
| 11            | C           | 2.246995                | 5.444755 | -0.061880 |
| 12            | C           | 3.626126                | 4.669420 | -0.044977 |

|    |   |           |           |           |
|----|---|-----------|-----------|-----------|
| 13 | N | 3.543843  | 3.853853  | -1.235783 |
| 14 | C | 2.343508  | 3.964903  | -1.887892 |
| 15 | N | 1.610638  | 4.938814  | -1.258272 |
| 16 | N | 1.638967  | 5.029992  | 1.179941  |
| 17 | C | 2.387512  | 4.112188  | 1.876060  |
| 18 | N | 3.571678  | 3.944880  | 1.205473  |
| 19 | O | 2.022325  | 3.372830  | -2.899826 |
| 20 | O | 2.083431  | 3.610639  | 2.938970  |
| 21 | C | 0.428004  | 5.509506  | -1.873288 |
| 22 | C | 0.431361  | 5.590979  | 1.742951  |
| 23 | C | 5.786173  | 1.760469  | 0.036181  |
| 24 | C | 6.105607  | 0.209404  | 0.079865  |
| 25 | N | 5.498012  | -0.275622 | -1.139939 |
| 26 | C | 4.818558  | 0.696433  | -1.828423 |
| 27 | N | 5.025176  | 1.889835  | -1.188417 |
| 28 | N | 5.039005  | 1.966069  | 1.256068  |
| 29 | C | 4.800504  | 0.805283  | 1.950245  |
| 30 | N | 5.457362  | -0.213074 | 1.300526  |
| 31 | O | 4.207505  | 0.540520  | -2.867295 |
| 32 | O | 4.183100  | 0.706096  | 2.989345  |
| 33 | C | 5.083988  | -3.324515 | 0.130142  |
| 34 | C | 3.978543  | -4.461976 | 0.130533  |
| 35 | N | 3.327409  | -4.269605 | -1.146079 |
| 36 | C | 3.796233  | -3.181580 | -1.837364 |
| 37 | N | 4.829756  | -2.637398 | -1.119646 |
| 38 | N | 4.771348  | -2.573328 | 1.323440  |
| 39 | C | 3.649169  | -3.026663 | 1.971162  |
| 40 | C | 0.470636  | 0.409885  | 1.644572  |
| 41 | C | -0.487600 | 0.733637  | 0.696908  |
| 42 | C | -0.306131 | 0.385391  | -0.636005 |
| 43 | C | 0.847331  | -0.275314 | -1.037366 |
| 44 | C | 1.782150  | -0.631558 | -0.075493 |
| 45 | C | 1.592020  | -0.303000 | 1.253837  |
| 46 | C | 1.185882  | -0.613193 | -2.488138 |
| 47 | C | 0.424785  | 0.949772  | 3.057399  |
| 48 | N | 0.125509  | -0.176313 | -3.431985 |
| 49 | N | -0.745279 | 0.464205  | 3.873928  |
| 50 | C | -0.757853 | -1.002237 | -3.944102 |
| 51 | O | -1.853279 | -0.225304 | -4.942724 |
| 52 | C | -1.077824 | 1.284783  | -4.665538 |
| 53 | C | -0.035903 | 1.153606  | -3.837083 |
| 54 | C | -1.321742 | 1.309618  | 4.824522  |
| 55 | C | -2.236660 | 0.676555  | 5.564669  |
| 56 | O | -2.442303 | -0.945087 | 5.037440  |
| 57 | C | -1.250956 | -0.745588 | 3.871033  |
| 58 | H | -2.818449 | 1.094452  | 6.351344  |
| 59 | H | -1.449015 | 2.201713  | -5.052263 |
| 60 | H | -0.924028 | -1.540888 | 3.236587  |
| 61 | H | -1.026193 | 2.329652  | 4.846101  |
| 62 | H | 0.628189  | 1.907942  | -3.478672 |
| 63 | H | -0.767847 | -2.044412 | -3.712021 |
| 64 | H | 1.309020  | -1.672869 | -2.625118 |
| 65 | H | 2.103101  | -0.126104 | -2.777519 |
| 66 | H | 2.676925  | -1.142172 | -0.360062 |
| 67 | H | -1.048167 | 0.661073  | -1.355059 |
| 68 | H | 0.348220  | 2.020524  | 3.050558  |
| 69 | H | 1.321535  | 0.675510  | 3.588704  |

|     |   |           |           |           |
|-----|---|-----------|-----------|-----------|
| 70  | H | 2.314356  | -0.576809 | 1.990010  |
| 71  | H | -1.364268 | 1.269122  | 0.996132  |
| 72  | N | 3.185773  | -4.128920 | 1.295578  |
| 73  | O | 3.400669  | -2.807825 | -2.922145 |
| 74  | O | 3.188481  | -2.574028 | 2.997419  |
| 75  | C | 5.673226  | -1.603643 | -1.694374 |
| 76  | C | 5.593202  | -1.525315 | 1.904202  |
| 77  | C | 4.660427  | 3.139628  | -1.824781 |
| 78  | C | 4.692848  | 3.255939  | 1.819777  |
| 79  | C | 0.617547  | -5.768262 | 0.004260  |
| 80  | C | -0.957537 | -5.736425 | -0.089773 |
| 81  | N | -1.184775 | -4.991320 | -1.312392 |
| 82  | C | -0.024714 | -4.571583 | -1.911359 |
| 83  | N | 1.023098  | -5.128428 | -1.226385 |
| 84  | N | 0.880137  | -4.999292 | 1.202488  |
| 85  | C | -0.260549 | -4.509450 | 1.791793  |
| 86  | N | -1.333141 | -5.041779 | 1.114900  |
| 87  | O | 0.053721  | -3.887529 | -2.917444 |
| 88  | O | -0.320155 | -3.804632 | 2.778853  |
| 89  | C | -4.204423 | -4.067507 | -0.244055 |
| 90  | C | -5.128136 | -2.782178 | -0.261027 |
| 91  | N | -4.671904 | -2.073172 | -1.439319 |
| 92  | C | -3.641624 | -2.708955 | -2.082409 |
| 93  | N | -3.375033 | -3.874364 | -1.412834 |
| 94  | N | -3.528609 | -3.953829 | 1.027513  |
| 95  | C | -3.862309 | -2.822868 | 1.721086  |
| 96  | N | -4.822152 | -2.156369 | 1.005831  |
| 97  | O | -3.110319 | -2.354313 | -3.117333 |
| 98  | O | -3.441393 | -2.518714 | 2.819338  |
| 99  | C | -2.473558 | -4.866066 | -1.966726 |
| 100 | C | -2.681553 | -4.963669 | 1.631551  |
| 101 | C | 2.372300  | -5.167407 | -1.761312 |
| 102 | C | 2.161492  | -4.966336 | 1.887411  |
| 103 | C | -5.543266 | -1.035826 | 1.575787  |
| 104 | C | -5.351383 | -0.933624 | -2.034304 |
| 105 | C | -3.976992 | 3.550910  | 1.722681  |
| 106 | C | -4.132007 | 3.784067  | -1.901691 |
| 107 | C | -5.285249 | 2.329926  | -0.120264 |
| 108 | C | -5.742802 | 0.816605  | -0.190870 |
| 109 | N | -5.107256 | 0.353230  | -1.407992 |
| 110 | N | -4.577861 | 2.510573  | -1.365037 |
| 111 | N | -4.460812 | 2.350407  | 1.070278  |
| 112 | C | -4.393256 | 1.134725  | 1.706061  |
| 113 | N | -5.212539 | 0.265127  | 1.033019  |
| 114 | C | -4.432261 | 1.346550  | -2.077406 |
| 115 | O | -3.778745 | 0.900716  | 2.725468  |
| 116 | O | -3.876604 | 1.234127  | -3.149101 |
| 117 | H | -3.633113 | 5.752072  | 0.032182  |
| 118 | H | -1.381510 | 6.717765  | -0.073344 |
| 119 | H | 2.348070  | 6.517743  | -0.105018 |
| 120 | H | 4.490295  | 5.314028  | -0.079620 |
| 121 | H | 0.508668  | 6.587595  | -1.826848 |
| 122 | H | 0.412760  | 5.182392  | -2.899143 |
| 123 | H | 0.412792  | 5.306317  | 2.781010  |
| 124 | H | 0.469918  | 6.667642  | 1.650533  |
| 125 | H | 6.664698  | 2.385829  | 0.011058  |
| 126 | H | 7.159408  | -0.018738 | 0.101444  |

|     |   |           |           |           |
|-----|---|-----------|-----------|-----------|
| 127 | H | 6.094159  | -3.700775 | 0.163119  |
| 128 | H | 4.382458  | -5.459156 | 0.210454  |
| 129 | H | 6.708141  | -1.893290 | -1.575857 |
| 130 | H | 5.416795  | -1.544169 | -2.738904 |
| 131 | H | 5.285878  | -1.426143 | 2.931801  |
| 132 | H | 6.629334  | -1.828862 | 1.846935  |
| 133 | H | 4.378483  | 2.899362  | -2.836156 |
| 134 | H | 5.522583  | 3.793382  | -1.820089 |
| 135 | H | 4.421005  | 3.081475  | 2.847397  |
| 136 | H | 5.560950  | 3.899241  | 1.764251  |
| 137 | H | 1.034640  | -6.759823 | 0.079298  |
| 138 | H | -1.417849 | -6.710140 | -0.139417 |
| 139 | H | -4.748494 | -4.996496 | -0.309619 |
| 140 | H | -6.181109 | -3.004106 | -0.334484 |
| 141 | H | -2.964117 | -5.829610 | -1.936200 |
| 142 | H | -2.286076 | -4.581549 | -2.987592 |
| 143 | H | -2.609268 | -4.715488 | 2.676473  |
| 144 | H | -3.150524 | -5.930009 | 1.508203  |
| 145 | H | 2.738577  | -6.180839 | -1.670664 |
| 146 | H | 2.310333  | -4.884105 | -2.798467 |
| 147 | H | 1.978975  | -4.573264 | 2.873730  |
| 148 | H | 2.536019  | -5.980151 | 1.951086  |
| 149 | H | -5.298855 | -1.014119 | 2.623914  |
| 150 | H | -6.603472 | -1.201063 | 1.442565  |
| 151 | H | -5.001172 | -0.853992 | -3.049480 |
| 152 | H | -6.415486 | -1.129527 | -2.021550 |
| 153 | H | -3.699553 | 3.270095  | 2.724485  |
| 154 | H | -4.779248 | 4.277496  | 1.745369  |
| 155 | H | -3.927690 | 3.626037  | -2.946940 |
| 156 | H | -4.928866 | 4.504662  | -1.779357 |
| 157 | H | -6.102607 | 3.028698  | -0.035122 |
| 158 | H | -6.812350 | 0.686056  | -0.240007 |



## Reference

1. Frisch, M. J.; Trucks, G. W.; Schlegel, H. B.; Scuseria, G. E.; Robb, M. A.; Cheeseman, J. R.; Montgomery, J. A. Jr.; Vreven, T.; Kudin, N.; Burant, J. C.; Millam, J. M.; Iyengar, S. S.; Tomasi, J.; Barone, V.; Mennucci, B.; Cossi, M.; Scalmani, G.; Rega, N.; Petersson, G. A.; Nakatsuji, H.; Hada, M.; Ehara, M.; Toyota, K.; Fukuda, R.; Hasegawa, J.; Ishida, M.; Nakajima, T.; Honda, Y.; Kitao, O.; Nakai, H.; Klene, M.; Li, X.; Knox, J. E.; Hratchian, H. P.; Cross, J. B.; Adamo, C.; Jaramillo, J.; Gomperts, R.; Stratmann, R. E.; Yazyev, O.; Austin, A. J.; Cammi, R.; Pomelli, C.; Ochterski, J. W.; Ayala, P. Y.; Morokuma, K.; Voth, G. A.; Salvador, P.; Dannenberg, J. J.; Zakrzewski, V. G.; Dapprich, S.; Daniels, A. D.; Strain, M. C.; Farkas, O.; Malick, D. K.; Rabuck, A. D.; Raghavachari, K.; Foresman, J. B.; Ortiz, J. V.; Cui, Q.; Baboul, A. G.; Clifford, S.; Cioslowski, J.; Stefanov, B. B.; Liu, G.; Liashenko, A.; Piskorz, P.; Komaromi, I.; Martin, R. L.; Fox, D. J.; Keith, T.; Al-Laham, M. A.; Peng, C. Y.; Nanayakkara, A.; Challacombe, M.; Gill, P. M. W.; Johnson, B.; Chen, W.; Wong, M. W.; Gonzalez, C.; Pople, J. A. *Gaussian 03, Revision C.02, Gaussian*, Pittsburgh, PA 2004.
